# Supplementary material for: Signature of resistance gene evolution and pyrethroid resistance escalation in the major malaria vector Anopheles funestus across Kenyan malaria-endemic regions separated by the Rift Valley
Source: Infect Dis Poverty. 2026 May 15;15:57. doi: 10.1186/s40249-026-01458-1 (PMC13179624; doi:10.1186/s40249-026-01458-1)
Supplement: Supplementary file 4 — Additional file 4: Fig. S2. Odds ratio versus allele comparisons among Anopheles funestus mosquitoes infected with Plasmodium sporozoites. [file 40249_2026_1458_MOESM4_ESM.xlsx]

## Sheet: Sheet1
Exposure/insecticide	Class of insecticide	Concentration evaluated	Test type
Permethrin	Pyrethroid, Type I	1x (0.75%), 5x (3.75%), 10x (7.5%)	WHO tube assay
Alpha-cypermethrin	Pyrethroid, Type II	1x (0.05%), 5x (0.25%), 10x (0.5%)	WHO tube assay
Deltamethrin	Pyrethroid, Type II	1x (0.05%), 5x (0.25%), 10x (0.5%)	WHO tube assay
DDT	Organochlorine	1x (4%)	WHO tube assay
Pirimiphos-methyl	Organophosphate	1x (0.25%)	WHO tube assay
Fenitrothion	Organophosphate	1x (1%)	WHO tube assay
Bendiocarb	Carbamate	1x (0.1%)	WHO tube assay
Piperonyl butoxide (PBO)	Synergist for P450s	0.04	WHO tube assay
Clothianidin	Neonicotinoid	1x (4ug)	Bottle assay
Chlorfenapyr	Pyrrole	1x (100ug)	Bottle assay
